# Supplementary material
Source: Springer Nature journal article supplement (https://www.springermedizin.de/resource/supplementary/12936_2007_552_MOESM5_ESM.pdf/9548272)

detrended data

2  
1  
0  
-1  
-2  
-3

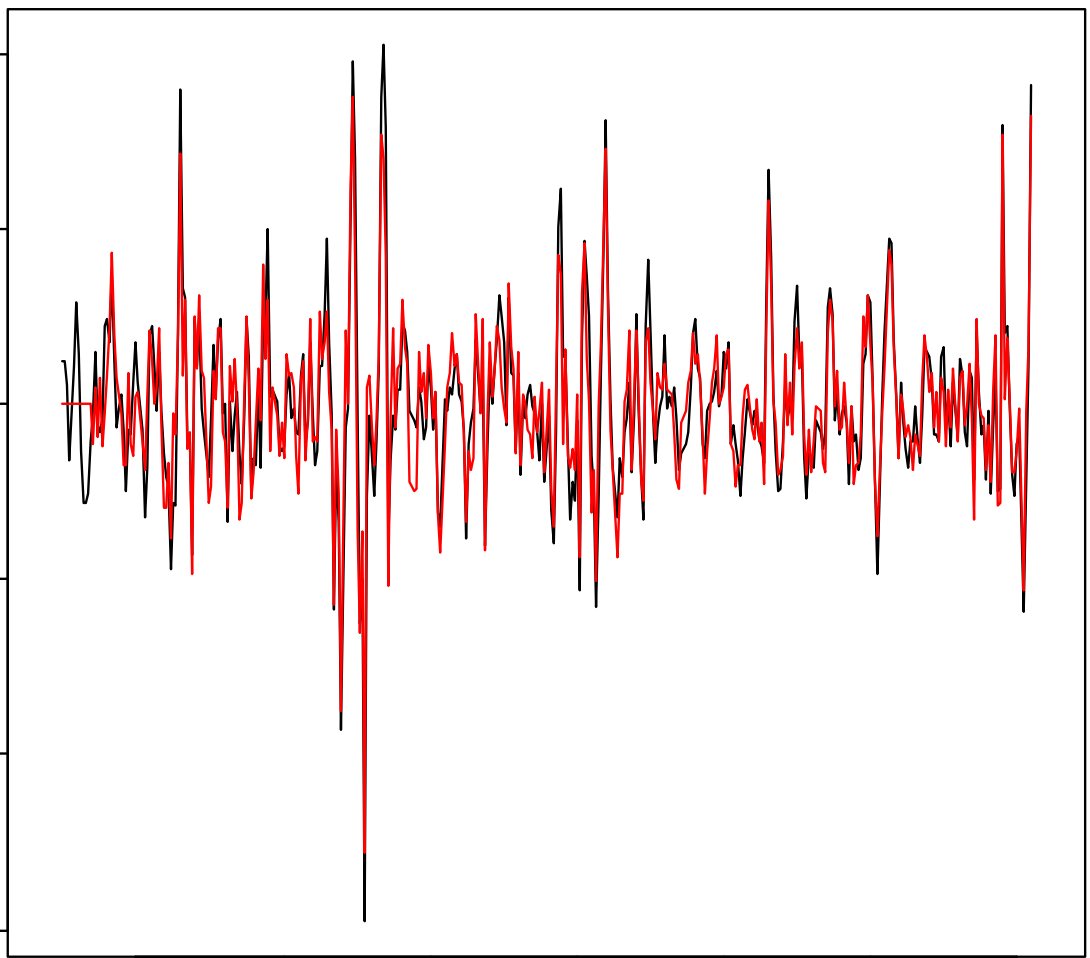

1975 1980 1985 1990 1995 2000 2005

Time

Supplement: MOESM5 [file 9548272]
